# Supplementary material for: Citizen science to monitor the establishment and spread of a biological control agent: the case of Pareuchaetes pseudoinsulata (Lepidoptera, Erebidae) for the control of Chromolaena odorata (Asteraceae) in South and South-East Asia
Source: Springer Nature journal article supplement (doi:10.1186/s43170-023-00171-5), 2023-08-14
Supplement: MOESM1 [file 43170_2023_171_MOESM1_ESM.xlsx]

## Sheet: S1 Cock et al 2023 Fig 2 observ
Additional file 1
Citizen science to monitor the establishment and spread of a biological control agent:
the case of Pareuchaetes pseudoinsulata (Lepidoptera, Erebidae) for the control of Chromolaena odorata (Asteraceae) in South and South-East Asia
Matthew J.W. Cock, Michael D. Day, Rachel L. Winston
CABI Agriculture & Bioscience
Geographical data extracted from iNaturalist for Fig. 2.
This includes all observations made until the end of May 2023, posted and identified as Pareuchaetes sp. or P. pseudoinsulata by 7 June 2023.
Observations 'needing ID' or identified as Pareuchaetes sp. were confirmed as P. pseudoinsulata by the authors.
id	observed_on	user_name	quality_grade	license	url	latitude	longitude	positional_accuracy	public_positional_accuracy	coordinates_obscured	place_state_name	place_country_name	scientific_name
68756349	2021-01-26	Caleb Jones	needs_id	CC-BY-NC	https://www.inaturalist.org/observations/68756349	11.7447	103.466	122	122	FALSE		Cambodia	Pareuchaetes pseudoinsulata
146751702	2022-02-04	lulucat	research		https://www.inaturalist.org/observations/146751702	21.9275	101.256	15	15	FALSE	è¥¿åŒç‰ˆçº³	China	Pareuchaetes pseudoinsulata
52352462	2020-07-08	åˆ˜å…‰è£• Liu Guangyu	needs_id	CC-BY-NC	https://www.inaturalist.org/observations/52352462	21.9159	101.267			FALSE	è¥¿åŒç‰ˆçº³	China	Pareuchaetes pseudoinsulata
115510612	2022-03-05	lulucat	research		https://www.inaturalist.org/observations/115510612	21.9113	101.275	122	122	FALSE	è¥¿åŒç‰ˆçº³	China	Pareuchaetes pseudoinsulata
119180803	2022-05-28	lulucat	research		https://www.inaturalist.org/observations/119180803	21.9194	101.277	61	61	FALSE	è¥¿åŒç‰ˆçº³	China	Pareuchaetes pseudoinsulata
115539316	2022-03-22	lulucat	research		https://www.inaturalist.org/observations/115539316	21.9196	101.277	61	61	FALSE	è¥¿åŒç‰ˆçº³	China	Pareuchaetes pseudoinsulata
77425640	2021-05-05	Justin Jacobs	needs_id	CC-BY-NC	https://www.inaturalist.org/observations/77425640	20.0185	110.224			FALSE		China	Pareuchaetes
142064460	2022-02-23	Hopeland	needs_id	CC-BY	https://www.inaturalist.org/observations/142064460	13.1058	79.0027		31045	TRUE	Andhra Pradesh	India	Pareuchaetes pseudoinsulata
142064467	2022-02-23	Hopeland	research	CC-BY	https://www.inaturalist.org/observations/142064467	13.1675	79.0099		31045	TRUE	Andhra Pradesh	India	Pareuchaetes pseudoinsulata
142064490	2022-02-23	Hopeland	needs_id	CC-BY	https://www.inaturalist.org/observations/142064490	13.1932	79.0421		31045	TRUE	Andhra Pradesh	India	Pareuchaetes
87572761	2021-02-21	Hopeland	research	CC-BY	https://www.inaturalist.org/observations/87572761	13.1235	79.0645		31045	TRUE	Andhra Pradesh	India	Pareuchaetes pseudoinsulata
142064494	2022-02-23	Hopeland	needs_id	CC-BY	https://www.inaturalist.org/observations/142064494	13.0455	79.1424		31045	TRUE	Andhra Pradesh	India	Pareuchaetes
142052438	2022-02-23	Hopeland	needs_id	CC-BY	https://www.inaturalist.org/observations/142052438	13.0653	79.1687		31045	TRUE	Andhra Pradesh	India	Pareuchaetes
87572764	2021-02-21	Hopeland	needs_id	CC-BY	https://www.inaturalist.org/observations/87572764	13.0603	79.1852		31045	TRUE	Andhra Pradesh	India	Pareuchaetes pseudoinsulata
125455738	2022-01-13	Senan D'Souza	needs_id		https://www.inaturalist.org/observations/125455738	14.0203	79.3194			FALSE	Andhra Pradesh	India	Pareuchaetes pseudoinsulata
57473018	2020-08-23	Senan D'Souza	research		https://www.inaturalist.org/observations/57473018	14.0203	79.3194	12	12	FALSE	Andhra Pradesh	India	Pareuchaetes pseudoinsulata
112017818	2022-02-04	Swati Udayraj	research		https://www.inaturalist.org/observations/112017818	13.6362	79.3948	1	1	FALSE	Andhra Pradesh	India	Pareuchaetes pseudoinsulata
107176965	2022-02-21	Raja bandi	needs_id	CC-BY	https://www.inaturalist.org/observations/107176965	13.6324	79.3992	7	7	FALSE	Andhra Pradesh	India	Pareuchaetes
104754971	2022-01-10	Viral joshi	research	CC-BY	https://www.inaturalist.org/observations/104754971	13.6541	79.4557			FALSE	Andhra Pradesh	India	Pareuchaetes pseudoinsulata
74336479	2021-03-29		research	CC-BY-NC	https://www.inaturalist.org/observations/74336479	13.103	74.9727	8	8	FALSE	Karnataka	India	Pareuchaetes pseudoinsulata
40517876	2020-02-08	Murali Mohan Bettampady	research	CC-BY-NC	https://www.inaturalist.org/observations/40517876	12.6625	75.1816	122	122	FALSE	Karnataka	India	Pareuchaetes pseudoinsulata
131162055	2021-08-09	keshav murthy	needs_id		https://www.inaturalist.org/observations/131162055	13.736	75.6294			FALSE	Karnataka	India	Pareuchaetes pseudoinsulata
106749668	2022-02-04	Hopeland	needs_id	CC-BY	https://www.inaturalist.org/observations/106749668	12.5531	75.6997		31081	TRUE	Karnataka	India	Pareuchaetes pseudoinsulata
90881663	2021-07-05	Priya Singh	research	CC-BY-NC	https://www.inaturalist.org/observations/90881663	11.9876	76.0964	538	31115	TRUE	Karnataka	India	Pareuchaetes pseudoinsulata
90881648	2021-07-02	Priya Singh	research	CC-BY-NC	https://www.inaturalist.org/observations/90881648	11.903	76.109	538	31115	TRUE	Karnataka	India	Pareuchaetes pseudoinsulata
94107013	2020-09-08		research	CC-BY-NC	https://www.inaturalist.org/observations/94107013	12.2694	76.612	2120	2120	FALSE	Karnataka	India	Pareuchaetes pseudoinsulata
88690487	2021-07-19	Nagesh Nagesh	needs_id	CC-BY-NC	https://www.inaturalist.org/observations/88690487	11.6612	76.6231	3093	3093	FALSE	Karnataka	India	Pareuchaetes pseudoinsulata
149610829	2023-02-19		research	CC-BY-NC	https://www.inaturalist.org/observations/149610829	12.1895	76.6425	249	249	FALSE	Karnataka	India	Pareuchaetes pseudoinsulata
150498661	2023-02-18		research	CC-BY-NC	https://www.inaturalist.org/observations/150498661	12.1914	76.6443	15	15	FALSE	Karnataka	India	Pareuchaetes pseudoinsulata
148310819	2023-02-08		research	CC-BY-NC	https://www.inaturalist.org/observations/148310819	12.1906	76.6571	15	15	FALSE	Karnataka	India	Pareuchaetes pseudoinsulata
157032427	2023-04-10	Aadhi	research	CC-BY-NC	https://www.inaturalist.org/observations/157032427	12.9206	77.4416	208	208	FALSE	Karnataka	India	Pareuchaetes pseudoinsulata
157032478	2023-04-03	Aadhi	needs_id	CC-BY-NC	https://www.inaturalist.org/observations/157032478	12.9206	77.4416	208	208	FALSE	Karnataka	India	Pareuchaetes
102866315	2021-12-11	Dhruthi Somesh	research		https://www.inaturalist.org/observations/102866315	13.6623	77.4604			FALSE	Karnataka	India	Pareuchaetes pseudoinsulata
138005979	2022-02-03	Chayant Gonsalves	research	CC-BY	https://www.inaturalist.org/observations/138005979	12.851	77.4986	33	33	FALSE	Karnataka	India	Pareuchaetes pseudoinsulata
145244013	2022-12-25	Debamita Chakrabarti	research	CC-BY-NC	https://www.inaturalist.org/observations/145244013	12.9504	77.5021	208	208	FALSE	Karnataka	India	Pareuchaetes pseudoinsulata
119865872	2022-06-02	Vaidya R	research		https://www.inaturalist.org/observations/119865872	12.9418	77.5089			FALSE	Karnataka	India	Pareuchaetes pseudoinsulata
106970011	2022-02-18	Vaidya R	research		https://www.inaturalist.org/observations/106970011	12.9425	77.5098			FALSE	Karnataka	India	Pareuchaetes pseudoinsulata
59950007	2020-09-18	Sriram Ranganathan	needs_id	CC-BY-NC	https://www.inaturalist.org/observations/59950007	12.8643	77.5213	263	263	FALSE	Karnataka	India	Pareuchaetes pseudoinsulata
105130931	2022-01-07		research	CC-BY-NC	https://www.inaturalist.org/observations/105130931	12.88	77.5291	22	22	FALSE	Karnataka	India	Pareuchaetes pseudoinsulata
146946513	2023-01-19	Subbu Ramanathan	research	CC-BY-NC	https://www.inaturalist.org/observations/146946513	12.8807	77.5294			FALSE	Karnataka	India	Pareuchaetes pseudoinsulata
102651471	2021-12-07	Subbu Ramanathan	needs_id	CC-BY-NC	https://www.inaturalist.org/observations/102651471	12.8804	77.5294	26	26	FALSE	Karnataka	India	Pareuchaetes pseudoinsulata
134717066	2022-09-12	Subbu Ramanathan	needs_id	CC-BY-NC	https://www.inaturalist.org/observations/134717066	12.8808	77.5294	21	21	FALSE	Karnataka	India	Pareuchaetes pseudoinsulata
93573631	2021-09-04	Subbu Ramanathan	needs_id	CC-BY-NC	https://www.inaturalist.org/observations/93573631	12.8808	77.5294	208	208	FALSE	Karnataka	India	Pareuchaetes pseudoinsulata
131472732	2022-08-19	Subbu Ramanathan	needs_id	CC-BY-NC	https://www.inaturalist.org/observations/131472732	12.8808	77.5294	15	15	FALSE	Karnataka	India	Pareuchaetes pseudoinsulata
136012302	2022-09-22	Subbu Ramanathan	needs_id	CC-BY-NC	https://www.inaturalist.org/observations/136012302	12.88	77.5295	24	24	FALSE	Karnataka	India	Pareuchaetes pseudoinsulata
106788880	2022-02-15	Subbu Ramanathan	research	CC-BY-NC	https://www.inaturalist.org/observations/106788880	12.8803	77.5296			FALSE	Karnataka	India	Pareuchaetes pseudoinsulata
86544690	2021-07-11	Subbu Ramanathan	research	CC-BY-NC	https://www.inaturalist.org/observations/86544690	12.879	77.5296	208	208	FALSE	Karnataka	India	Pareuchaetes pseudoinsulata
146685117	2023-01-16	Subbu Ramanathan	needs_id	CC-BY-NC	https://www.inaturalist.org/observations/146685117	12.88	77.5296			FALSE	Karnataka	India	Pareuchaetes pseudoinsulata
147443245	2023-01-27	Subbu Ramanathan	research	CC-BY-NC	https://www.inaturalist.org/observations/147443245	12.8812	77.5297			FALSE	Karnataka	India	Pareuchaetes pseudoinsulata
100756975	2021-11-10	Subbu Ramanathan	research	CC-BY-NC	https://www.inaturalist.org/observations/100756975	12.8786	77.5297	208	208	FALSE	Karnataka	India	Pareuchaetes pseudoinsulata
70923221	2021-03-10	Subbu Ramanathan	research	CC-BY-NC	https://www.inaturalist.org/observations/70923221	12.8784	77.5297	323	323	FALSE	Karnataka	India	Pareuchaetes pseudoinsulata
128116320	2022-07-27	Subbu Ramanathan	needs_id	CC-BY-NC	https://www.inaturalist.org/observations/128116320	12.8796	77.5298	14	14	FALSE	Karnataka	India	Pareuchaetes pseudoinsulata
146536904	2023-01-14	Subbu Ramanathan	needs_id	CC-BY-NC	https://www.inaturalist.org/observations/146536904	12.8789	77.5299	218	218	FALSE	Karnataka	India	Pareuchaetes pseudoinsulata
69705840	2021-02-17	Subbu Ramanathan	needs_id	CC-BY-NC	https://www.inaturalist.org/observations/69705840	12.8797	77.5299	175	175	FALSE	Karnataka	India	Pareuchaetes pseudoinsulata
124697012	2022-07-04	Subbu Ramanathan	needs_id	CC-BY-NC	https://www.inaturalist.org/observations/124697012	12.8799	77.5301	98	98	FALSE	Karnataka	India	Pareuchaetes
100502025	2021-11-07	Subbu Ramanathan	research	CC-BY-NC	https://www.inaturalist.org/observations/100502025	12.8789	77.5301	208	208	FALSE	Karnataka	India	Pareuchaetes pseudoinsulata
100502026	2021-11-07	Subbu Ramanathan	research	CC-BY-NC	https://www.inaturalist.org/observations/100502026	12.8789	77.5301	208	208	FALSE	Karnataka	India	Pareuchaetes pseudoinsulata
102075874	2021-11-28	Subbu Ramanathan	research	CC-BY-NC	https://www.inaturalist.org/observations/102075874	12.8789	77.5301	208	208	FALSE	Karnataka	India	Pareuchaetes pseudoinsulata
103878024	2021-12-29	Subbu Ramanathan	research	CC-BY-NC	https://www.inaturalist.org/observations/103878024	12.8789	77.5301	208	208	FALSE	Karnataka	India	Pareuchaetes pseudoinsulata
144549509	2022-12-17	Nikkitha	research	CC-BY-NC-SA	https://www.inaturalist.org/observations/144549509	12.8071	77.5557	1401	1401	FALSE	Karnataka	India	Pareuchaetes pseudoinsulata
104020785	2021-12-06	Sushma N M	research	CC-BY-NC	https://www.inaturalist.org/observations/104020785	12.797	77.5765	206	206	FALSE	Karnataka	India	Pareuchaetes pseudoinsulata
35748300	2019-10-31	po-po-pro	research	CC-BY	https://www.inaturalist.org/observations/35748300	12.9716	77.5946	38456	38456	FALSE	Karnataka	India	Pareuchaetes pseudoinsulata
124988507	2022-07-06	Prem Prakash Garg	needs_id	CC-BY-NC	https://www.inaturalist.org/observations/124988507	12.7734	77.6179	2	2	FALSE	Karnataka	India	Pareuchaetes
129001390	2022-07-31	OnePlanet	research		https://www.inaturalist.org/observations/129001390	12.2842	75.1602	26	26	FALSE	Kerala	India	Pareuchaetes pseudoinsulata
67250977	2020-12-29	OnePlanet	research		https://www.inaturalist.org/observations/67250977	12.2841	75.1603	9	9	FALSE	Kerala	India	Pareuchaetes pseudoinsulata
66619661	2020-12-15	OnePlanet	research		https://www.inaturalist.org/observations/66619661	12.2843	75.1603	9	9	FALSE	Kerala	India	Pareuchaetes pseudoinsulata
66693927	2020-12-17	OnePlanet	research		https://www.inaturalist.org/observations/66693927	12.2842	75.1603	10	10	FALSE	Kerala	India	Pareuchaetes pseudoinsulata
66657808	2020-12-16	OnePlanet	research		https://www.inaturalist.org/observations/66657808	12.2842	75.1604	9	9	FALSE	Kerala	India	Pareuchaetes pseudoinsulata
89191749	2021-07-28	Manoj Karingamadathil	research	CC-BY	https://www.inaturalist.org/observations/89191749	12.0602	75.199	668	668	FALSE	Kerala	India	Pareuchaetes pseudoinsulata
89192541	2021-07-30	Manoj Karingamadathil	research	CC-BY	https://www.inaturalist.org/observations/89192541	12.0602	75.199	668	668	FALSE	Kerala	India	Pareuchaetes pseudoinsulata
89205874	2021-07-30	Manoj Karingamadathil	research	CC-BY	https://www.inaturalist.org/observations/89205874	12.0602	75.199	668	668	FALSE	Kerala	India	Pareuchaetes pseudoinsulata
29784039	2019-07-29	Manoj Karingamadathil	research	CC-BY	https://www.inaturalist.org/observations/29784039	12.0537	75.1992	105	105	FALSE	Kerala	India	Pareuchaetes pseudoinsulata
88024806	2021-07-21	Manoj Karingamadathil	research	CC-BY	https://www.inaturalist.org/observations/88024806	12.0575	75.2006	237	237	FALSE	Kerala	India	Pareuchaetes pseudoinsulata
88086917	2021-07-22	Manoj Karingamadathil	research	CC-BY	https://www.inaturalist.org/observations/88086917	12.0575	75.2006	237	237	FALSE	Kerala	India	Pareuchaetes pseudoinsulata
88087570	2021-07-22	Manoj Karingamadathil	research	CC-BY	https://www.inaturalist.org/observations/88087570	12.0575	75.2006	237	237	FALSE	Kerala	India	Pareuchaetes pseudoinsulata
87577189	2021-07-18	Manoj Karingamadathil	research	CC-BY	https://www.inaturalist.org/observations/87577189	12.0575	75.2006	237	237	FALSE	Kerala	India	Pareuchaetes pseudoinsulata
87578581	2021-07-18	Manoj Karingamadathil	research	CC-BY	https://www.inaturalist.org/observations/87578581	12.0575	75.2006	237	237	FALSE	Kerala	India	Pareuchaetes pseudoinsulata
94998044	2021-09-12	Manoj Karingamadathil	research	CC-BY	https://www.inaturalist.org/observations/94998044	12.0525	75.2138	3596	3596	FALSE	Kerala	India	Pareuchaetes pseudoinsulata
94998061	2021-09-12	Manoj Karingamadathil	research	CC-BY	https://www.inaturalist.org/observations/94998061	12.0525	75.2138	3596	3596	FALSE	Kerala	India	Pareuchaetes pseudoinsulata
94998139	2021-09-11	Manoj Karingamadathil	research	CC-BY	https://www.inaturalist.org/observations/94998139	12.0525	75.2138	3596	3596	FALSE	Kerala	India	Pareuchaetes pseudoinsulata
89798552	2021-08-02	Unnikrishnan M P	research	CC-BY-NC	https://www.inaturalist.org/observations/89798552	12.1544	75.2508	1601	1601	FALSE	Kerala	India	Pareuchaetes pseudoinsulata
89925684	2021-08-04	Abi A Sebastian	research	CC-BY-NC	https://www.inaturalist.org/observations/89925684	12.4929	75.276	36	36	FALSE	Kerala	India	Pareuchaetes pseudoinsulata
131865887	2021-03-11		research	CC-BY-NC	https://www.inaturalist.org/observations/131865887	12.0269	75.3893	1169	1169	FALSE	Kerala	India	Pareuchaetes pseudoinsulata
123687794	2022-06-27	Keerthana	research	CC-BY-NC	https://www.inaturalist.org/observations/123687794	11.6486	75.5696	226	226	FALSE	Kerala	India	Pareuchaetes pseudoinsulata
131497143	2022-07-07		research	CC-BY-NC	https://www.inaturalist.org/observations/131497143	11.6412	75.9802			FALSE	Kerala	India	Pareuchaetes pseudoinsulata
131497144	2022-07-07		research	CC-BY-NC	https://www.inaturalist.org/observations/131497144	11.6412	75.9802			FALSE	Kerala	India	Pareuchaetes pseudoinsulata
62388684	2020-10-12	anjooriya jose	needs_id	CC-BY-NC	https://www.inaturalist.org/observations/62388684	11.6925	76.065			FALSE	Kerala	India	Pareuchaetes
88009076	2021-07-21	SUBHASH PULIKKAL	research	CC-BY-NC	https://www.inaturalist.org/observations/88009076	11.1883	76.2609	1115	1115	FALSE	Kerala	India	Pareuchaetes pseudoinsulata
143414041	2022-11-06		needs_id	CC-BY-NC	https://www.inaturalist.org/observations/143414041	10.8733	76.3	227	227	FALSE	Kerala	India	Pareuchaetes
88139972	2021-07-22	Ashitha. K. A	research	CC-BY-NC	https://www.inaturalist.org/observations/88139972	10.785	76.3248	77	77	FALSE	Kerala	India	Pareuchaetes pseudoinsulata
134557286	2022-09-11	Ganesh Mohan T	needs_id	CC-BY-SA	https://www.inaturalist.org/observations/134557286	9.67414	76.3401	3828	3828	FALSE	Kerala	India	Pareuchaetes
53814532	2020-07-21		research	CC-BY	https://www.inaturalist.org/observations/53814532	10.0292	76.3594	2	2	FALSE	Kerala	India	Pareuchaetes pseudoinsulata
53972022	2020-07-22		research	CC-BY	https://www.inaturalist.org/observations/53972022	10.0292	76.3594	2	2	FALSE	Kerala	India	Pareuchaetes pseudoinsulata
132533753	2022-08-28	Santhosh Kumar	research		https://www.inaturalist.org/observations/132533753	10.1673	76.3927	253	253	FALSE	Kerala	India	Pareuchaetes pseudoinsulata
83655680	2021-06-19		research	CC-BY-NC	https://www.inaturalist.org/observations/83655680	10.2966	76.4399	14383	14383	FALSE	Kerala	India	Pareuchaetes pseudoinsulata
38057378	2020-01-28	Shibi Moses	research		https://www.inaturalist.org/observations/38057378	9.55482	76.5645	9	9	FALSE	Kerala	India	Pareuchaetes pseudoinsulata
33588762	2019-09-29	Dr.Nishad PM	needs_id	CC-BY-NC	https://www.inaturalist.org/observations/33588762	9.37239	76.5838			FALSE	Kerala	India	Pareuchaetes pseudoinsulata
54306279	2020-07-25	Navin P Mathew	research	CC-BY-NC	https://www.inaturalist.org/observations/54306279	9.38428	76.6011		31245	TRUE	Kerala	India	Pareuchaetes pseudoinsulata
54190202	2020-07-24	Navin P Mathew	needs_id	CC-BY-NC	https://www.inaturalist.org/observations/54190202	9.31717	76.6067		31245	TRUE	Kerala	India	Pareuchaetes pseudoinsulata
138127077	2022-10-09	Vijay rj	research		https://www.inaturalist.org/observations/138127077	9.59175	76.6197			FALSE	Kerala	India	Pareuchaetes pseudoinsulata
83001798	2021-06-14	Renjith Jacob Mathews	research	CC-BY	https://www.inaturalist.org/observations/83001798	10.0337	76.6211	1068	1068	FALSE	Kerala	India	Pareuchaetes pseudoinsulata
125741227	2022-07-11	Renjith Jacob Mathews	research	CC-BY	https://www.inaturalist.org/observations/125741227	10.0337	76.6211	1067	1067	FALSE	Kerala	India	Pareuchaetes pseudoinsulata
35219648	2015-01-26		research	CC-BY-NC	https://www.inaturalist.org/observations/35219648	10.1298	76.6872			FALSE	Kerala	India	Pareuchaetes pseudoinsulata
68861180	2021-01-31	Divin Venu	research	CC-BY-NC	https://www.inaturalist.org/observations/68861180	9.0974	76.8209	8	8	FALSE	Kerala	India	Pareuchaetes pseudoinsulata
161529454	2023-05-10	renjus box	research	CC-BY	https://www.inaturalist.org/observations/161529454	9.62782	76.8782			FALSE	Kerala	India	Pareuchaetes pseudoinsulata
59322870	2020-02-03		needs_id	CC-BY-NC	https://www.inaturalist.org/observations/59322870	8.63204	76.9204	349	349	FALSE	Kerala	India	Pareuchaetes pseudoinsulata
88712550	2021-06-27		research	CC-BY-NC	https://www.inaturalist.org/observations/88712550	9.06463	76.9307			FALSE	Kerala	India	Pareuchaetes pseudoinsulata
162858078	2023-05-21		research	CC-BY-NC	https://www.inaturalist.org/observations/162858078	9.06454	76.9309			FALSE	Kerala	India	Pareuchaetes pseudoinsulata
71406429	2021-03-17	Rahul R Nath	research	CC-BY-SA	https://www.inaturalist.org/observations/71406429	8.44493	76.97	27	27	FALSE	Kerala	India	Pareuchaetes pseudoinsulata
803904	2014-07-26	Chief RedEarth	needs_id	CC-BY-NC-ND	http://www.inaturalist.org/observations/803904	8.45255	76.9744	1208	1208	FALSE	Kerala	India	Pareuchaetes pseudoinsulata
70246679	2021-02-21	Pranav Chandra Bose	research	CC-BY	https://www.inaturalist.org/observations/70246679	8.42945	76.9762	7	7	FALSE	Kerala	India	Pareuchaetes pseudoinsulata
120780713	2022-05-28	Chief RedEarth	research	CC-BY-NC-ND	https://www.inaturalist.org/observations/120780713	8.96151	77.0346	230	230	FALSE	Kerala	India	Pareuchaetes pseudoinsulata
123833884	2022-06-01	Chief RedEarth	research	CC-BY-NC-ND	https://www.inaturalist.org/observations/123833884	8.96151	77.0346	230	230	FALSE	Kerala	India	Pareuchaetes pseudoinsulata
68960574	2021-01-15	Rajiv R	research		https://www.inaturalist.org/observations/68960574	10.0889	77.0595	2249	2249	FALSE	Kerala	India	Pareuchaetes pseudoinsulata
140472653	2022-10-30	Steffin	research	CC-BY-NC	https://www.inaturalist.org/observations/140472653	8.31788	77.0714			FALSE	Kerala	India	Pareuchaetes pseudoinsulata
76425627	2019-07-20	Tarunkishwor Yumnam	research		https://www.inaturalist.org/observations/76425627	8.67916	77.1359	165	165	FALSE	Kerala	India	Pareuchaetes pseudoinsulata
71878808	2021-03-23	my_rutika	research	CC-BY-NC	https://www.inaturalist.org/observations/71878808	8.68018	77.136	25	25	FALSE	Kerala	India	Pareuchaetes pseudoinsulata
26234577	2019-06-02	Saloni	needs_id	CC-BY-NC	https://www.inaturalist.org/observations/26234577	8.68018	77.1361			FALSE	Kerala	India	Pareuchaetes
27078453	2019-06-16	C L Dheeraj	needs_id	CC-BY	https://www.inaturalist.org/observations/27078453	8.67991	77.1363	5	5	FALSE	Kerala	India	Pareuchaetes pseudoinsulata
35731771	2019-11-16	C L Dheeraj	research	CC-BY	https://www.inaturalist.org/observations/35731771	8.68175	77.1364	132	132	FALSE	Kerala	India	Pareuchaetes pseudoinsulata
88578449	2021-07-25		research	CC-BY-NC	https://www.inaturalist.org/observations/88578449	8.68229	77.1365	212	212	FALSE	Kerala	India	Pareuchaetes pseudoinsulata
38821965	2019-12-17	Jewel Johnson	needs_id	CC-BY	https://www.inaturalist.org/observations/38821965	8.68229	77.1365	213	213	FALSE	Kerala	India	Pareuchaetes pseudoinsulata
36647725	2019-12-14	Mahesh A	research	CC-BY-NC	https://www.inaturalist.org/observations/36647725	10.2803	77.1667	33	33	FALSE	Kerala	India	Pareuchaetes pseudoinsulata
54282527	2020-07-24		research		https://www.inaturalist.org/observations/54282527	9.54778	77.1907	899	899	FALSE	Kerala	India	Pareuchaetes pseudoinsulata
87734245	2018-12-16	Rohit Girotra	research	CC-BY-NC	https://www.inaturalist.org/observations/87734245	10.3068	77.206	210	210	FALSE	Kerala	India	Pareuchaetes pseudoinsulata
41023998	2018-01-26	Anubhav Agarwal	research	CC-BY-NC	https://www.inaturalist.org/observations/41023998	11.5722	76.6427	235	235	FALSE	Tamil Nadu	India	Pareuchaetes pseudoinsulata
56247001	2014-06-24	Anubhav Agarwal	needs_id	CC-BY-NC	https://www.inaturalist.org/observations/56247001	11.5722	76.6427	235	235	FALSE	Tamil Nadu	India	Pareuchaetes pseudoinsulata
119048312	2022-05-10	ANAMIKA GAUTAM	research		https://www.inaturalist.org/observations/119048312	11.0926	76.7842			FALSE	Tamil Nadu	India	Pareuchaetes pseudoinsulata
53575781	2019-11-08	Vasudeesha Hosabettu	needs_id		https://www.inaturalist.org/observations/53575781	11.2463	76.7889	200	200	FALSE	Tamil Nadu	India	Pareuchaetes
87818628	2019-11-08	Rohit Girotra	research	CC-BY-NC	https://www.inaturalist.org/observations/87818628	10.9675	76.9182	56301	56301	FALSE	Tamil Nadu	India	Pareuchaetes pseudoinsulata
87825707	2019-11-09	Rohit Girotra	needs_id	CC-BY-NC	https://www.inaturalist.org/observations/87825707	10.9675	76.9182	56301	56301	FALSE	Tamil Nadu	India	Pareuchaetes
87825711	2019-11-09	Rohit Girotra	research	CC-BY-NC	https://www.inaturalist.org/observations/87825711	10.9675	76.9182	56301	56301	FALSE	Tamil Nadu	India	Pareuchaetes pseudoinsulata
29966169	2019-07-28	Jaya Rakesh	research	CC0	https://www.inaturalist.org/observations/29966169	11.3568	76.9258			FALSE	Tamil Nadu	India	Pareuchaetes pseudoinsulata
50536261	2016-07-08	Anubhav Agarwal	needs_id	CC-BY-NC	https://www.inaturalist.org/observations/50536261	11.6733	77.129	2124	2124	FALSE	Tamil Nadu	India	Pareuchaetes pseudoinsulata
34292168	2019-10-06	Adit Jeyan	research	CC-BY-NC	https://www.inaturalist.org/observations/34292168	11.6732	77.1291	404	404	FALSE	Tamil Nadu	India	Pareuchaetes pseudoinsulata
34306556	2019-10-06	Subash Jeyan	research	CC-BY-NC	https://www.inaturalist.org/observations/34306556	11.6732	77.1296	15	15	FALSE	Tamil Nadu	India	Pareuchaetes pseudoinsulata
145164336	2022-12-21	Seema Merchant	research	CC-BY-NC	https://www.inaturalist.org/observations/145164336	9.64718	77.1768	75	75	FALSE	Tamil Nadu	India	Pareuchaetes pseudoinsulata
104178159	2022-01-02	Seema Merchant	research	CC-BY-NC	https://www.inaturalist.org/observations/104178159	9.64695	77.1769	75	75	FALSE	Tamil Nadu	India	Pareuchaetes pseudoinsulata
143863296	2022-12-05	Seema Merchant	research	CC-BY-NC	https://www.inaturalist.org/observations/143863296	9.64723	77.177	150	150	FALSE	Tamil Nadu	India	Pareuchaetes pseudoinsulata
145121429	2022-12-24	Rajanna	research	CC-BY-ND	https://www.inaturalist.org/observations/145121429	10.3569	77.1996	351	351	FALSE	Tamil Nadu	India	Pareuchaetes pseudoinsulata
145123989	2022-12-25	Rajanna	research	CC-BY-ND	https://www.inaturalist.org/observations/145123989	10.3569	77.1996	351	351	FALSE	Tamil Nadu	India	Pareuchaetes pseudoinsulata
165457319	2023-05-02	Paulmathi Vinod	needs_id	CC-BY	https://www.inaturalist.org/observations/165457319	8.39965	77.2586	216	216	FALSE	Tamil Nadu	India	Pareuchaetes pseudoinsulata
154059257	2021-04-18	Thalavaipandi ATREE-ACCC	research	CC-BY	https://www.inaturalist.org/observations/154059257	8.53812	77.338	2631	2631	FALSE	Tamil Nadu	India	Pareuchaetes pseudoinsulata
86682212	2019-01-11	Thalavaipandi ATREE-ACCC	research	CC-BY-NC	https://www.inaturalist.org/observations/86682212	8.52437	77.3593			FALSE	Tamil Nadu	India	Pareuchaetes pseudoinsulata
86696498	2019-05-03	Thalavaipandi ATREE-ACCC	research	CC-BY-NC	https://www.inaturalist.org/observations/86696498	8.52437	77.3593			FALSE	Tamil Nadu	India	Pareuchaetes pseudoinsulata
87287492	2020-03-03	Thalavaipandi ATREE-ACCC	research	CC-BY-NC	https://www.inaturalist.org/observations/87287492	8.52437	77.3593			FALSE	Tamil Nadu	India	Pareuchaetes pseudoinsulata
61546464	2017-10-16	Civin Solomon	needs_id	CC-BY-NC	https://www.inaturalist.org/observations/61546464	8.41144	77.3906	15	15	FALSE	Tamil Nadu	India	Pareuchaetes pseudoinsulata
150476431	2023-03-05	Paulmathi Vinod	research	CC-BY	https://www.inaturalist.org/observations/150476431	8.37812	77.408	214	214	FALSE	Tamil Nadu	India	Pareuchaetes pseudoinsulata
97650145	2021-10-06	Thalavaipandi ATREE-ACCC	research	CC-BY-NC	https://www.inaturalist.org/observations/97650145	8.65577	77.448			FALSE	Tamil Nadu	India	Pareuchaetes pseudoinsulata
158620413	2023-05-01	Vinoth Pranav	research		https://www.inaturalist.org/observations/158620413	9.50279	77.5013			FALSE	Tamil Nadu	India	Pareuchaetes pseudoinsulata
158506920	2023-05-01	Sharan V	needs_id	CC-BY-NC	https://www.inaturalist.org/observations/158506920	9.50272	77.5014			FALSE	Tamil Nadu	India	Pareuchaetes pseudoinsulata
145240761	2022-12-23	Sharan V	research	CC-BY-NC	https://www.inaturalist.org/observations/145240761	9.52337	77.5408	606	606	FALSE	Tamil Nadu	India	Pareuchaetes pseudoinsulata
149455833	2023-02-18		needs_id	CC-BY-NC	https://www.inaturalist.org/observations/149455833	8.42571	77.5967	5	5	FALSE	Tamil Nadu	India	Pareuchaetes
143637918	2022-11-27	Ritesh	research	CC-BY-NC	https://www.inaturalist.org/observations/143637918	12.3361	77.8178	26736	26736	FALSE	Tamil Nadu	India	Pareuchaetes pseudoinsulata
143637922	2022-11-27	Ritesh	research	CC-BY-NC	https://www.inaturalist.org/observations/143637922	12.3361	77.8178	26736	26736	FALSE	Tamil Nadu	India	Pareuchaetes pseudoinsulata
143637924	2022-11-27	Ritesh	research	CC-BY-NC	https://www.inaturalist.org/observations/143637924	12.3361	77.8178	26736	26736	FALSE	Tamil Nadu	India	Pareuchaetes pseudoinsulata
143012999	2022-11-27	Ritu	research	CC-BY-NC	https://www.inaturalist.org/observations/143012999	12.418	77.8558	210	210	FALSE	Tamil Nadu	India	Pareuchaetes pseudoinsulata
165466854	2023-06-04	Ritu	needs_id	CC-BY-NC	https://www.inaturalist.org/observations/165466854	12.677	77.911			FALSE	Tamil Nadu	India	Pareuchaetes
106964936	2022-02-13	Anubhav Agarwal	needs_id	CC-BY-NC	https://www.inaturalist.org/observations/106964936	10.1942	77.9967	17561	17561	FALSE	Tamil Nadu	India	Pareuchaetes pseudoinsulata
118496399	2022-05-14	Anubhav Agarwal	research	CC-BY-NC	https://www.inaturalist.org/observations/118496399	10.1942	77.9967	17561	17561	FALSE	Tamil Nadu	India	Pareuchaetes pseudoinsulata
102933332	2021-12-12	Elavarasan M	research	CC-BY-NC	https://www.inaturalist.org/observations/102933332	11.7461	78.1703	196	196	FALSE	Tamil Nadu	India	Pareuchaetes pseudoinsulata
75731899	2021-04-30	Elavarasan M	needs_id	CC-BY-NC	https://www.inaturalist.org/observations/75731899	11.6859	78.1757			FALSE	Tamil Nadu	India	Pareuchaetes
145501471	2022-12-29	Elavarasan M	research	CC-BY-NC	https://www.inaturalist.org/observations/145501471	11.686	78.1757			FALSE	Tamil Nadu	India	Pareuchaetes pseudoinsulata
89444767	2021-07-11	Elavarasan M	research	CC-BY-NC	https://www.inaturalist.org/observations/89444767	11.7356	78.202	75905	75905	FALSE	Tamil Nadu	India	Pareuchaetes pseudoinsulata
156698730	2023-02-04	Dinesh Kumar	research		https://www.inaturalist.org/observations/156698730	12.5266	78.215	2117	2117	FALSE	Tamil Nadu	India	Pareuchaetes pseudoinsulata
103529060	2021-12-19	Rohit Girotra	research	CC-BY-NC	https://www.inaturalist.org/observations/103529060	11.8079	78.3122	11187	11187	FALSE	Tamil Nadu	India	Pareuchaetes pseudoinsulata
96670883	2021-07-30	Hopeland	needs_id	CC-BY	https://www.inaturalist.org/observations/96670883	11.8406	78.4011		31115	TRUE	Tamil Nadu	India	Pareuchaetes pseudoinsulata
106593562	2022-02-02	Hopeland	needs_id	CC-BY	https://www.inaturalist.org/observations/106593562	11.8075	78.4157		31115	TRUE	Tamil Nadu	India	Pareuchaetes pseudoinsulata
106732654	2022-02-02	Hopeland	needs_id	CC-BY	https://www.inaturalist.org/observations/106732654	11.8819	78.4166		31115	TRUE	Tamil Nadu	India	Pareuchaetes pseudoinsulata
106732633	2022-02-02	Hopeland	needs_id	CC-BY	https://www.inaturalist.org/observations/106732633	11.8112	78.4316		31115	TRUE	Tamil Nadu	India	Pareuchaetes pseudoinsulata
106732650	2022-02-02	Hopeland	needs_id	CC-BY	https://www.inaturalist.org/observations/106732650	11.922	78.4346		31115	TRUE	Tamil Nadu	India	Pareuchaetes pseudoinsulata
102234770	2021-10-09	Hopeland	research	CC-BY	https://www.inaturalist.org/observations/102234770	11.9895	78.4531	31	31115	TRUE	Tamil Nadu	India	Pareuchaetes pseudoinsulata
106377661	2022-02-02	Hopeland	needs_id	CC-BY	https://www.inaturalist.org/observations/106377661	11.8835	78.4655		31115	TRUE	Tamil Nadu	India	Pareuchaetes pseudoinsulata
106384580	2022-02-02	Hopeland	needs_id	CC-BY	https://www.inaturalist.org/observations/106384580	11.9903	78.4854		31115	TRUE	Tamil Nadu	India	Pareuchaetes pseudoinsulata
106732652	2022-02-02	Hopeland	needs_id	CC-BY	https://www.inaturalist.org/observations/106732652	11.9452	78.5049		31115	TRUE	Tamil Nadu	India	Pareuchaetes pseudoinsulata
106732634	2022-02-02	Hopeland	needs_id	CC-BY	https://www.inaturalist.org/observations/106732634	11.9267	78.5087		31115	TRUE	Tamil Nadu	India	Pareuchaetes pseudoinsulata
106377662	2022-02-02	Hopeland	needs_id	CC-BY	https://www.inaturalist.org/observations/106377662	11.9334	78.5117		31115	TRUE	Tamil Nadu	India	Pareuchaetes pseudoinsulata
106377664	2022-02-02	Hopeland	needs_id	CC-BY	https://www.inaturalist.org/observations/106377664	11.8688	78.5414		31115	TRUE	Tamil Nadu	India	Pareuchaetes pseudoinsulata
106732637	2022-02-02	Hopeland	needs_id	CC-BY	https://www.inaturalist.org/observations/106732637	11.9056	78.543		31115	TRUE	Tamil Nadu	India	Pareuchaetes pseudoinsulata
106593570	2022-02-02	Hopeland	needs_id	CC-BY	https://www.inaturalist.org/observations/106593570	11.9158	78.5524		31115	TRUE	Tamil Nadu	India	Pareuchaetes pseudoinsulata
106735003	2022-02-02	Hopeland	needs_id	CC-BY	https://www.inaturalist.org/observations/106735003	11.8507	78.5693		31115	TRUE	Tamil Nadu	India	Pareuchaetes pseudoinsulata
106593556	2022-02-02	Hopeland	needs_id	CC-BY	https://www.inaturalist.org/observations/106593556	11.9931	78.5708		31115	TRUE	Tamil Nadu	India	Pareuchaetes
106732616	2022-02-02	Hopeland	needs_id	CC-BY	https://www.inaturalist.org/observations/106732616	11.9043	78.5866		31115	TRUE	Tamil Nadu	India	Pareuchaetes pseudoinsulata
106734976	2022-02-02	Hopeland	needs_id	CC-BY	https://www.inaturalist.org/observations/106734976	11.8644	78.5885		31115	TRUE	Tamil Nadu	India	Pareuchaetes pseudoinsulata
136004544	2022-09-20	Ramkumar	needs_id		https://www.inaturalist.org/observations/136004544	11.9106	78.6165	724	724	FALSE	Tamil Nadu	India	Pareuchaetes pseudoinsulata
104399647	2022-01-02	DivCan	needs_id	CC-BY-NC-ND	https://www.inaturalist.org/observations/104399647	12.5481	78.6558	209	31081	TRUE	Tamil Nadu	India	Pareuchaetes
147237559	2023-01-23	Harshjeet Singh Bal	research	CC-BY	https://www.inaturalist.org/observations/147237559	12.8648	79.1335			FALSE	Tamil Nadu	India	Pareuchaetes pseudoinsulata
152041202	2023-03-23	Harshjeet Singh Bal	research	CC-BY	https://www.inaturalist.org/observations/152041202	12.875	79.1352			FALSE	Tamil Nadu	India	Pareuchaetes pseudoinsulata
148978706	2023-02-17	Harshjeet Singh Bal	research	CC-BY	https://www.inaturalist.org/observations/148978706	12.8749	79.1353			FALSE	Tamil Nadu	India	Pareuchaetes pseudoinsulata
153127724	2023-04-02	Vijay Anand Ismavel	research	CC-BY-NC	https://www.inaturalist.org/observations/153127724	12.8835	79.1474	4	4	FALSE	Tamil Nadu	India	Pareuchaetes pseudoinsulata
105149564	2022-01-17	Samrudh Nandagopal	research	CC-BY-NC	https://www.inaturalist.org/observations/105149564	12.9986	79.1808	207	207	FALSE	Tamil Nadu	India	Pareuchaetes pseudoinsulata
105612058	2022-01-17	Aaditya S Rajesh	needs_id	CC-BY-NC	https://www.inaturalist.org/observations/105612058	12.8659	79.3755	2115	2115	FALSE	Tamil Nadu	India	Pareuchaetes
105649439	2022-01-17	Aaditya S Rajesh	needs_id	CC-BY-NC	https://www.inaturalist.org/observations/105649439	12.8659	79.3755	2115	2115	FALSE	Tamil Nadu	India	Pareuchaetes pseudoinsulata
90520571	2021-08-09	Albert Kang	research	CC-BY-NC	https://www.inaturalist.org/observations/90520571	5.46512	100.282	3314	3314	FALSE	Pulau Pinang	Malaysia	Pareuchaetes pseudoinsulata
105409321	2022-01-21	Faris Aiman	needs_id		https://www.inaturalist.org/observations/105409321	5.35579	100.289	27	27	FALSE	Pulau Pinang	Malaysia	Pareuchaetes
22573242	2019-04-17	Calvin Hoo	research	CC-BY-NC	https://www.inaturalist.org/observations/22573242	5.35634	100.291	65	65	FALSE	Pulau Pinang	Malaysia	Pareuchaetes pseudoinsulata
11266590	2018-04-21	AnnLazaro	research	CC-BY-SA	https://www.inaturalist.org/observations/11266590	10.4036	123.918			FALSE		Philippines	Pareuchaetes pseudoinsulata
9945635	2016-09-01	AnnLazaro	needs_id	CC-BY-SA	https://www.inaturalist.org/observations/9945635	10.4037	123.918	22	22	FALSE		Philippines	Pareuchaetes pseudoinsulata
68391127	2021-01-21	Erwin Koehler	research	CC-BY-NC	https://www.inaturalist.org/observations/68391127	11.2309	124.014			FALSE		Philippines	Pareuchaetes pseudoinsulata
5045544	2017-02-02	Erwin Koehler	research	CC-BY-NC	https://www.inaturalist.org/observations/5045544	11.26	124.055	64	64	FALSE		Philippines	Pareuchaetes pseudoinsulata
5045499	2017-02-01	Erwin Koehler	research	CC-BY-NC	https://www.inaturalist.org/observations/5045499	11.2601	124.055	64	64	FALSE		Philippines	Pareuchaetes pseudoinsulata
10797644	2018-04-11	Erwin Koehler	research	CC-BY-NC	https://www.inaturalist.org/observations/10797644	11.2603	124.055			FALSE		Philippines	Pareuchaetes pseudoinsulata
18932772	2018-12-09	Erwin Koehler	research	CC-BY-NC	https://www.inaturalist.org/observations/18932772	11.2603	124.055			FALSE		Philippines	Pareuchaetes pseudoinsulata
9961222	2018-02-21	Erwin Koehler	research	CC-BY-NC	https://www.inaturalist.org/observations/9961222	11.2604	124.055			FALSE		Philippines	Pareuchaetes pseudoinsulata
161351295	2023-05-13	Kai Squires	research	CC-BY	https://www.inaturalist.org/observations/161351295	10.1146	124.904	227	227	FALSE		Philippines	Pareuchaetes pseudoinsulata
165281781	2023-06-03	Kai Squires	research	CC-BY	https://www.inaturalist.org/observations/165281781	10.1651	124.906	827	827	FALSE		Philippines	Pareuchaetes pseudoinsulata
25177271	2019-04-04		research	CC-BY-NC	https://www.inaturalist.org/observations/25177271	8.21593	125.05	7175	7175	FALSE		Philippines	Pareuchaetes pseudoinsulata
134968625	2022-09-12		research	CC-BY-NC	https://www.inaturalist.org/observations/134968625	6.82287	80.0404	4	4	FALSE		Sri Lanka	Pareuchaetes pseudoinsulata
156010519	2023-02-18	Michael and Nancy van der Poorten	research	CC-BY-NC	https://www.inaturalist.org/observations/156010519	7.61512	80.1826	70	70	FALSE		Sri Lanka	Pareuchaetes pseudoinsulata
156010666	2023-02-15	Michael and Nancy van der Poorten	research	CC-BY-NC	https://www.inaturalist.org/observations/156010666	7.61512	80.1826	70	70	FALSE		Sri Lanka	Pareuchaetes pseudoinsulata
156010715	2023-02-09	Michael and Nancy van der Poorten	research	CC-BY-NC	https://www.inaturalist.org/observations/156010715	7.61512	80.1826	70	70	FALSE		Sri Lanka	Pareuchaetes pseudoinsulata
39092014	2020-02-23		research	CC-BY-NC	https://www.inaturalist.org/observations/39092014	6.50005	80.32			FALSE		Sri Lanka	Pareuchaetes pseudoinsulata
77390139	2021-05-04	Poornima Wijerathna	research		https://www.inaturalist.org/observations/77390139	8.78422	80.4208	4123	4123	FALSE		Sri Lanka	Pareuchaetes pseudoinsulata
37127593	2016-03-10	Rob C. H. M. Oudejans	research	CC-BY-NC	https://www.inaturalist.org/observations/37127593	6.38972	80.5014	211	211	FALSE		Sri Lanka	Pareuchaetes pseudoinsulata
37127829	2016-03-10	Rob C. H. M. Oudejans	research	CC-BY-NC	https://www.inaturalist.org/observations/37127829	6.38972	80.5014	211	211	FALSE		Sri Lanka	Pareuchaetes pseudoinsulata
121528699	2022-06-13	Malki	research		https://www.inaturalist.org/observations/121528699	7.59847	80.5258	1289	1289	FALSE		Sri Lanka	Pareuchaetes pseudoinsulata
108290825	2022-03-07	Gihan Jayaweera	research		https://www.inaturalist.org/observations/108290825	7.44764	80.6035	1107	1107	FALSE		Sri Lanka	Pareuchaetes pseudoinsulata
93437044	2021-09-03	kasun	research	CC-BY-NC	https://www.inaturalist.org/observations/93437044	6.40274	80.6283	5	5	FALSE		Sri Lanka	Pareuchaetes pseudoinsulata
111504848	2022-04-15	Chathuranga Hettiarachchi	research	CC-BY-NC	https://www.inaturalist.org/observations/111504848	6.46332	80.6802	20	31350	TRUE		Sri Lanka	Pareuchaetes pseudoinsulata
37806906	2020-01-19	Roman Prokhorov	research	CC-BY-NC	https://www.inaturalist.org/observations/37806906	7.64517	80.7112	61	61	FALSE		Sri Lanka	Pareuchaetes pseudoinsulata
52221197	2020-06-23	Chathuri Jayatissa	research	CC-BY-NC	https://www.inaturalist.org/observations/52221197	7.526	80.7341	216	216	FALSE		Sri Lanka	Pareuchaetes pseudoinsulata
150894522	2023-02-26	Tharindu Ranasinhe	research		https://www.inaturalist.org/observations/150894522	7.54837	80.7534			FALSE		Sri Lanka	Pareuchaetes pseudoinsulata
114253014	2022-04-05	ThÃ©alie Dhellemmes	research	CC-BY-SA	https://www.inaturalist.org/observations/114253014	7.2912	80.7639			FALSE		Sri Lanka	Pareuchaetes pseudoinsulata
26058532	2019-05-27	Nuwan Chathuranga	research	CC-BY-NC	https://www.inaturalist.org/observations/26058532	7.64555	80.9273	5694	5694	FALSE		Sri Lanka	Pareuchaetes pseudoinsulata
144234186	2022-12-12		needs_id	CC-BY	https://www.inaturalist.org/observations/144234186	6.74695	80.9569			FALSE		Sri Lanka	Pareuchaetes pseudoinsulata
144234361	2022-12-12		research	CC-BY	https://www.inaturalist.org/observations/144234361	6.74706	80.9569			FALSE		Sri Lanka	Pareuchaetes pseudoinsulata
35569951	2014-07-26	Scott Young	needs_id		https://www.inaturalist.org/observations/35569951	6.8711	81.0461			FALSE		Sri Lanka	Pareuchaetes pseudoinsulata
37104887	2016-03-04	Rob C. H. M. Oudejans	research	CC-BY-NC	https://www.inaturalist.org/observations/37104887	6.8667	81.0466	1558	1558	FALSE		Sri Lanka	Pareuchaetes pseudoinsulata
106299201	2022-01-31	Nuwan Chathuranga	research	CC-BY-NC	https://www.inaturalist.org/observations/106299201	7.21473	81.5354	198	198	FALSE		Sri Lanka	Pareuchaetes pseudoinsulata
152672240	2009-10-28	JÃ¶rg und Ines	research		https://www.inaturalist.org/observations/152672240	8.63555	98.2456	792	792	FALSE		Thailand	Pareuchaetes pseudoinsulata
146506425	2022-03-12	John_Ibis	research	CC-BY-NC-ND	https://www.inaturalist.org/observations/146506425	19.3994	98.7758	244	244	FALSE		Thailand	Pareuchaetes pseudoinsulata
129903941	2022-08-01	Gaell Mainguy	research	CC-BY-NC-ND	https://www.inaturalist.org/observations/129903941	7.73065	98.7821	39	39	FALSE		Thailand	Pareuchaetes pseudoinsulata
155619887	2023-03-16		research	CC-BY-NC	https://www.inaturalist.org/observations/155619887	16.0165	98.8547	226	226	FALSE		Thailand	Pareuchaetes pseudoinsulata
87381816	2021-07-17	Cheryl Stinchcomb	research		https://www.inaturalist.org/observations/87381816	18.7595	98.9187	210	210	FALSE		Thailand	Pareuchaetes pseudoinsulata
96889991	2021-10-02	Cheryl Stinchcomb	research		https://www.inaturalist.org/observations/96889991	18.7595	98.9187	210	210	FALSE		Thailand	Pareuchaetes pseudoinsulata
107031784	2022-02-19	Cheryl Stinchcomb	research		https://www.inaturalist.org/observations/107031784	18.7595	98.9187	210	210	FALSE		Thailand	Pareuchaetes pseudoinsulata
107467263	2022-02-26	Cheryl Stinchcomb	research		https://www.inaturalist.org/observations/107467263	18.7595	98.9187	210	210	FALSE		Thailand	Pareuchaetes pseudoinsulata
145174982	2022-12-27	Cheryl Stinchcomb	research		https://www.inaturalist.org/observations/145174982	18.7595	98.9187	210	210	FALSE		Thailand	Pareuchaetes pseudoinsulata
145270109	2022-12-28	Cheryl Stinchcomb	research		https://www.inaturalist.org/observations/145270109	18.7595	98.9187	210	210	FALSE		Thailand	Pareuchaetes pseudoinsulata
144985700	2022-02-24	John_Ibis	research	CC-BY-NC-ND	https://www.inaturalist.org/observations/144985700	19.363	98.923	31	31	FALSE		Thailand	Pareuchaetes pseudoinsulata
144985702	2021-12-31	John_Ibis	research	CC-BY-NC-ND	https://www.inaturalist.org/observations/144985702	19.363	98.923	31	31	FALSE		Thailand	Pareuchaetes pseudoinsulata
144985703	2021-12-31	John_Ibis	research	CC-BY-NC-ND	https://www.inaturalist.org/observations/144985703	19.363	98.923	31	31	FALSE		Thailand	Pareuchaetes pseudoinsulata
144985704	2022-02-08	John_Ibis	research	CC-BY-NC-ND	https://www.inaturalist.org/observations/144985704	19.363	98.923	31	31	FALSE		Thailand	Pareuchaetes pseudoinsulata
144985706	2022-03-07	John_Ibis	research	CC-BY-NC-ND	https://www.inaturalist.org/observations/144985706	19.363	98.923	31	31	FALSE		Thailand	Pareuchaetes pseudoinsulata
144985707	2022-10-17	John_Ibis	research	CC-BY-NC-ND	https://www.inaturalist.org/observations/144985707	19.363	98.923	31	31	FALSE		Thailand	Pareuchaetes pseudoinsulata
144985708	2022-10-17	John_Ibis	research	CC-BY-NC-ND	https://www.inaturalist.org/observations/144985708	19.363	98.923	31	31	FALSE		Thailand	Pareuchaetes pseudoinsulata
105892181	2022-01-30	Jacky CUDON	research	CC-BY-NC	https://www.inaturalist.org/observations/105892181	18.8168	98.9241	240	240	FALSE		Thailand	Pareuchaetes pseudoinsulata
143016000	2021-12-29		research	CC-BY-NC	https://www.inaturalist.org/observations/143016000	18.8168	98.9241	240	240	FALSE		Thailand	Pareuchaetes pseudoinsulata
143021216	2022-11-24	Jacky CUDON	research	CC-BY-NC	https://www.inaturalist.org/observations/143021216	18.8168	98.9241	240	240	FALSE		Thailand	Pareuchaetes pseudoinsulata
146941121	2023-01-19	Jacky CUDON	research	CC-BY-NC	https://www.inaturalist.org/observations/146941121	18.8168	98.9241	240	240	FALSE		Thailand	Pareuchaetes pseudoinsulata
147262217	2023-01-23	Jacky CUDON	research	CC-BY-NC	https://www.inaturalist.org/observations/147262217	18.8168	98.9241	240	240	FALSE		Thailand	Pareuchaetes pseudoinsulata
147400386	2023-01-26	Jacky CUDON	research	CC-BY-NC	https://www.inaturalist.org/observations/147400386	18.8168	98.9241	240	240	FALSE		Thailand	Pareuchaetes pseudoinsulata
147676626	2023-01-29	Jacky CUDON	research	CC-BY-NC	https://www.inaturalist.org/observations/147676626	18.8168	98.9241	240	240	FALSE		Thailand	Pareuchaetes pseudoinsulata
147677408	2023-01-29	Jacky CUDON	research	CC-BY-NC	https://www.inaturalist.org/observations/147677408	18.8168	98.9241	240	240	FALSE		Thailand	Pareuchaetes pseudoinsulata
147807059	2023-01-31	Jacky CUDON	research	CC-BY-NC	https://www.inaturalist.org/observations/147807059	18.8168	98.9241	240	240	FALSE		Thailand	Pareuchaetes pseudoinsulata
148367645	2023-02-08	Jacky CUDON	research	CC-BY-NC	https://www.inaturalist.org/observations/148367645	18.8168	98.9241	240	240	FALSE		Thailand	Pareuchaetes pseudoinsulata
148874313	2023-02-15	Jacky CUDON	research	CC-BY-NC	https://www.inaturalist.org/observations/148874313	18.8168	98.9241	240	240	FALSE		Thailand	Pareuchaetes pseudoinsulata
146887330	2023-01-19	Rod Swift	research	CC-BY-NC	https://www.inaturalist.org/observations/146887330	18.8168	98.9259	61	61	FALSE		Thailand	Pareuchaetes pseudoinsulata
107075955	2022-02-19		research	CC-BY-NC	https://www.inaturalist.org/observations/107075955	18.6726	98.9276	4565	4565	FALSE		Thailand	Pareuchaetes pseudoinsulata
147603359	2023-01-28	Cheryl Stinchcomb	research		https://www.inaturalist.org/observations/147603359	19.3988	98.9298	210	210	FALSE		Thailand	Pareuchaetes pseudoinsulata
133756625	2022-09-01	tu bgood	needs_id		https://www.inaturalist.org/observations/133756625	18.9231	98.9355	31	31	FALSE		Thailand	Pareuchaetes pseudoinsulata
87400130	2021-07-17	Jacky CUDON	research	CC-BY-NC	https://www.inaturalist.org/observations/87400130	18.7948	98.9486	208	208	FALSE		Thailand	Pareuchaetes pseudoinsulata
19856684	2018-12-03	Pam Piombino	research	CC-BY-NC	https://www.inaturalist.org/observations/19856684	14.3266	98.966	8	8	FALSE		Thailand	Pareuchaetes pseudoinsulata
145930020	2023-01-04	Pam Piombino	research	CC-BY-NC	https://www.inaturalist.org/observations/145930020	14.3269	98.9672	158	158	FALSE		Thailand	Pareuchaetes pseudoinsulata
64847731	2020-11-14	Cheryl Stinchcomb	research		https://www.inaturalist.org/observations/64847731	18.7572	99.0201	212	212	FALSE		Thailand	Pareuchaetes pseudoinsulata
138058730	2022-10-08	Karnrawee Tongmaleewan	research	CC-BY-NC	https://www.inaturalist.org/observations/138058730	14.1311	99.1488			FALSE		Thailand	Pareuchaetes pseudoinsulata
147523463	2023-01-28	Thanaphat Klubchum	research		https://www.inaturalist.org/observations/147523463	14.1283	99.1552	11	11	FALSE		Thailand	Pareuchaetes pseudoinsulata
89888981	2021-07-31	Natthaphat Chotjuckdikul	research		https://www.inaturalist.org/observations/89888981	13.572	99.223	8	8	FALSE		Thailand	Pareuchaetes pseudoinsulata
130659738	2022-08-06	Sarawin Kreangpichitchai	research		https://www.inaturalist.org/observations/130659738	13.5552	99.23	4	4	FALSE		Thailand	Pareuchaetes pseudoinsulata
99945785	2021-09-16	Khemthong Tonsakulrungruang	research	CC-BY-NC	https://www.inaturalist.org/observations/99945785	13.6034	99.2342	22615	22615	FALSE		Thailand	Pareuchaetes pseudoinsulata
106844460	2021-12-03	Khemthong Tonsakulrungruang	research	CC-BY-NC	https://www.inaturalist.org/observations/106844460	13.6034	99.2342	22615	22615	FALSE		Thailand	Pareuchaetes pseudoinsulata
106157417	2021-12-03	Patta Vangtal	research		https://www.inaturalist.org/observations/106157417	13.6001	99.3229	26944	26944	FALSE		Thailand	Pareuchaetes pseudoinsulata
106790561	2021-12-03	Patta Vangtal	research		https://www.inaturalist.org/observations/106790561	13.6001	99.3229	26944	26944	FALSE		Thailand	Pareuchaetes pseudoinsulata
11402284	2012-01-04	Jan Fischer Rasmussen	research	CC-BY-NC	https://www.inaturalist.org/observations/11402284	20.0626	99.3611	50	50	FALSE		Thailand	Pareuchaetes pseudoinsulata
141460312	2022-11-01	Walk A Long	research	CC-BY-NC	https://www.inaturalist.org/observations/141460312	13.3082	99.4139	4	4	FALSE		Thailand	Pareuchaetes pseudoinsulata
110572266	2022-04-06	tu bgood	research		https://www.inaturalist.org/observations/110572266	13.2671	99.5539			FALSE		Thailand	Pareuchaetes pseudoinsulata
12627562	2018-01-22	Jan Fischer Rasmussen	research	CC-BY-NC	https://www.inaturalist.org/observations/12627562	11.3325	99.5582	19	19	FALSE		Thailand	Pareuchaetes pseudoinsulata
9536168	2018-01-12	Pam Piombino	research	CC-BY-NC	https://www.inaturalist.org/observations/9536168	17.9321	99.5618	207	207	FALSE		Thailand	Pareuchaetes pseudoinsulata
165649994	2022-12-28	Pam Piombino	research	CC-BY-NC	https://www.inaturalist.org/observations/165649994	12.8434	99.5896	4	4	FALSE		Thailand	Pareuchaetes pseudoinsulata
88503175	2018-03-09		research	CC-BY	https://www.inaturalist.org/observations/88503175	12.8423	99.5908	291	291	FALSE		Thailand	Pareuchaetes pseudoinsulata
109148364	2022-01-25		needs_id	CC-BY	https://www.inaturalist.org/observations/109148364	12.0798	99.69	49	49	FALSE		Thailand	Pareuchaetes pseudoinsulata
21141374	2011-02-27	Les Day	research	CC-BY-NC	https://www.inaturalist.org/observations/21141374	9.57309	99.9603	211	211	FALSE		Thailand	Pareuchaetes pseudoinsulata
96235755	2021-09-16		research	CC-BY-NC	https://www.inaturalist.org/observations/96235755	18.1521	99.9845	188	188	FALSE		Thailand	Pareuchaetes pseudoinsulata
138965871	2022-10-16	Siriwat Dangsri	research		https://www.inaturalist.org/observations/138965871	9.57837	100.079	198	198	FALSE		Thailand	Pareuchaetes pseudoinsulata
151702035	2022-12-18	Kritsada Moomuang	research	CC-BY-NC	https://www.inaturalist.org/observations/151702035	13.6543	100.469	9	9	FALSE		Thailand	Pareuchaetes pseudoinsulata
68581862	2021-01-22	Leonard Worthington	research	CC-BY	https://www.inaturalist.org/observations/68581862	12.9241	100.887	64	64	FALSE		Thailand	Pareuchaetes pseudoinsulata
72005756	2021-03-24	Leonard Worthington	research	CC-BY	https://www.inaturalist.org/observations/72005756	12.9243	100.887	129	129	FALSE		Thailand	Pareuchaetes pseudoinsulata
108016473	2022-03-05	Leonard Worthington	research	CC-BY	https://www.inaturalist.org/observations/108016473	12.9243	100.887	129	129	FALSE		Thailand	Pareuchaetes pseudoinsulata
164810134	2023-05-31	Wich'yanan L	research	CC-BY	https://www.inaturalist.org/observations/164810134	6.42464	100.922			FALSE		Thailand	Pareuchaetes pseudoinsulata
37808373	2020-01-20	Pam Piombino	research	CC-BY-NC	https://www.inaturalist.org/observations/37808373	19.1627	100.95	4	4	FALSE		Thailand	Pareuchaetes pseudoinsulata
75033243	2021-04-24		research	CC-BY-NC	https://www.inaturalist.org/observations/75033243	13.2246	101.066	2906	2906	FALSE		Thailand	Pareuchaetes pseudoinsulata
70926189	2018-01-06	Pam Piombino	research	CC-BY-NC	https://www.inaturalist.org/observations/70926189	17.2807	101.162	12	12	FALSE		Thailand	Pareuchaetes pseudoinsulata
39635040	2020-01-16	Pam Piombino	research	CC-BY-NC	https://www.inaturalist.org/observations/39635040	19.273	101.18	31	31	FALSE		Thailand	Pareuchaetes pseudoinsulata
148691467	2023-02-13	Luis Silva	research	CC-BY-NC	https://www.inaturalist.org/observations/148691467	14.4396	101.223	4	30954	TRUE		Thailand	Pareuchaetes pseudoinsulata
147026767	2023-01-21		research	CC-BY-SA	https://www.inaturalist.org/observations/147026767	14.5963	101.226	833	833	FALSE		Thailand	Pareuchaetes pseudoinsulata
147304448	2023-01-24		research	CC-BY-SA	https://www.inaturalist.org/observations/147304448	14.5959	101.228	208	208	FALSE		Thailand	Pareuchaetes pseudoinsulata
126377986	2022-07-11	Sarawin Kreangpichitchai	research		https://www.inaturalist.org/observations/126377986	14.5608	101.303	4	4	FALSE		Thailand	Pareuchaetes pseudoinsulata
53948420	2019-06-30	Khemthong Tonsakulrungruang	research	CC-BY-NC	https://www.inaturalist.org/observations/53948420	14.4393	101.372	33852	33852	FALSE		Thailand	Pareuchaetes pseudoinsulata
79727766	2021-05-08	Khemthong Tonsakulrungruang	research	CC-BY-NC	https://www.inaturalist.org/observations/79727766	14.4393	101.372	33852	33852	FALSE		Thailand	Pareuchaetes pseudoinsulata
146879750	2023-01-07	Andaman Kaosung	research		https://www.inaturalist.org/observations/146879750	14.4192	101.383	3538	3538	FALSE		Thailand	Pareuchaetes pseudoinsulata
20049784	2018-11-04	Pam Piombino	research	CC-BY-NC	https://www.inaturalist.org/observations/20049784	16.5276	101.646	15	15	FALSE		Thailand	Pareuchaetes pseudoinsulata
131683491	2022-08-21		research	CC-BY-NC	https://www.inaturalist.org/observations/131683491	16.053	103.652	87816	87816	FALSE		Thailand	Pareuchaetes pseudoinsulata
145312959	2022-12-29		research	CC-BY-NC	https://www.inaturalist.org/observations/145312959	16.053	103.652	87816	87816	FALSE		Thailand	Pareuchaetes pseudoinsulata
38787007	2020-02-18	Bug's eyes photography	needs_id	CC-BY-NC-SA	https://www.inaturalist.org/observations/38787007	20.7945	106.99			FALSE	Ã?ng B?ng SÃ´ng H?ng	Vietnam	Pareuchaetes pseudoinsulata
42914831	2020-04-21	Bug's eyes photography	needs_id	CC-BY-NC-SA	https://www.inaturalist.org/observations/42914831	20.7943	106.991	131	131	FALSE	Ã?ng B?ng SÃ´ng H?ng	Vietnam	Pareuchaetes pseudoinsulata
37522803	2020-01-11	Luan Mai Sy	needs_id	CC-BY-NC	https://www.inaturalist.org/observations/37522803	20.7614	107.03			FALSE	Ã?ng B?ng SÃ´ng H?ng	Vietnam	Pareuchaetes pseudoinsulata
105695152	2022-01-21		research	CC-BY	https://www.inaturalist.org/observations/105695152	10.7839	106.791	5	5	FALSE	ÃÃ´ng Nam B?	Vietnam	Pareuchaetes pseudoinsulata
99690649	2021-06-08	Minh TÃ²ng	needs_id		https://www.inaturalist.org/observations/99690649	10.8469	106.828	20	20	FALSE	ÃÃ´ng Nam B?	Vietnam	Pareuchaetes pseudoinsulata
